# Supplementary material
Source: ML conference proceedings conference paper supplement (https://openaccess.thecvf.com/content/CVPR2023/html/Han_Reinforcement_Learning-Based_Black-Box_CVPR_2023_paper.html)
Supplement: Supplementary file 1 [file Han_Reinforcement_Learning-Based_Black-Box_CVPR_2023_supplemental.pdf]

# Reinforcement Learning-Based Black-Box Model Inversion Attacks

Gyojin Han

Jaehyun Choi

Haeil Lee

Junmo Kim

School of Electrical Engineering, KAIST

{hangj0820, chlwogus, haeil.lee, junmo.kim}@kaist.ac.kr

## A. Network architectures of Soft Actor-Critic

In this section, we describe the architectures of the actor networks and critic networks of Soft Actor-Critic (SAC) [4] agents used in RLB-MI. Table 1 shows the hyperparameters for both networks.

| Parameter                        | Value |
|----------------------------------|-------|
| Number of hidden layers          | 2     |
| Number of hidden units per layer | 256   |
| Activation function              | ReLU  |

Table 1. Network architectures of both actor networks and critic networks.

## B. Experiments on digit classification task

To evaluate our method on a task other than face recognition, we experiment with the baseline model inversion attacks [1, 5, 8, 9] and RLB-MI on the digit classification task. We use a network with 3 convolutional layers and 2 pooling layers as a target model and a network with 5 convolutional layers and 2 pooling layers as an evaluation model. We train the target model with a private dataset, MNIST handwritten digit data [6], and use EMNIST-Letters [3] as a public dataset. We reconstruct 10 images of each digit from 0 to 9 using 10 random seeds. Therefore, all attacks are evaluated with a total of 100 generated images. Our proposed method, RLB-MI, outperforms other baseline attacks as shown in Table 2. In addition, Figure 1 shows that RLB-MI reconstructs the important features of each digit.

| Type       | Method               | Attack Acc   | KNN Dist   | Feat Dist   |
|------------|----------------------|--------------|------------|-------------|
| White-box  | GMI                  | 0.840        | 10.4       | 28.7        |
|            | KED-MI               | 0.980        | 22.0       | 59.1        |
| Black-box  | LB-MI                | 0.400        | 30.1       | 78.9        |
|            | <b>RLB-MI (Ours)</b> | <b>1.000</b> | <b>6.3</b> | <b>23.1</b> |
| Label-only | BREP-MI              | 0.960        | 12.1       | 39.9        |

Table 2. Attack performance of the model inversion attacks on the MNIST digit classifier.

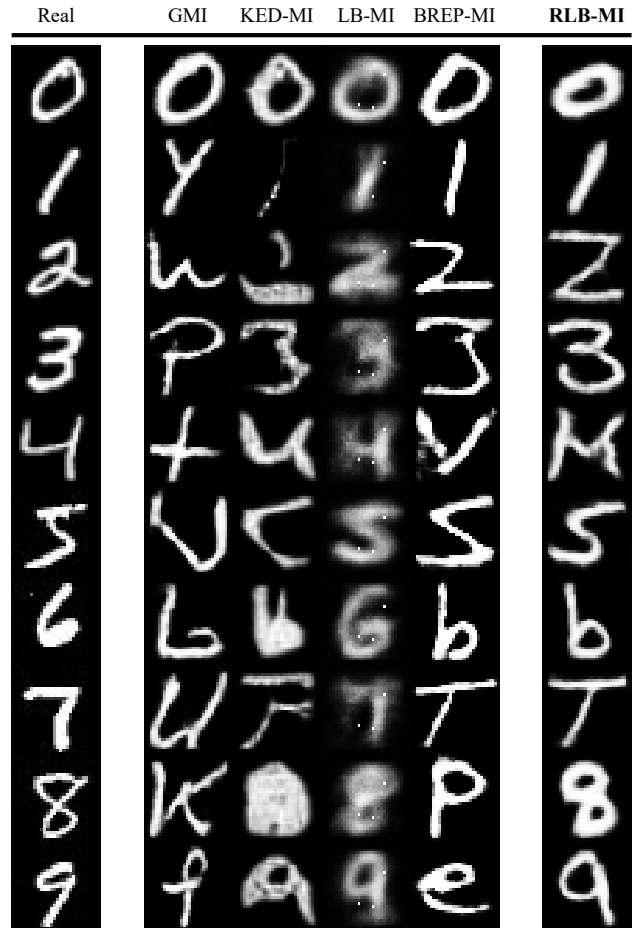

Figure 1. Real samples and attack images from MNIST. The left-most images are real samples and the images in the same row are for the same digit.

## C. Ablation Study on Reward Term

To better understand the effect of the proposed reward term  $r_3$  on the performance of our attack, we conduct an ablation study on  $r_3$ . The performance of our attack is evaluated with and without the  $r_3$  term in the reward function.

We use the target model of Face.evoLve [2] architecture trained with CelebA [7] for this experiment. As shown in Table 3, it can be observed through all the metrics that the attack performance is significantly improved when  $r_3$  is included in the reward function.

| Method               | Attack Acc | KNN Dist | Feat Dist |
|----------------------|------------|----------|-----------|
| RLB-MI (w/o $r_3$ )  | 0.576      | 1361.5   | 1273.7    |
| RLB-MI (with $r_3$ ) | 0.793      | 1225.6   | 1112.1    |

Table 3. Ablation study results on the reward term  $r_3$ .

## References

- [1] Si Chen, Mostafa Kahla, Ruoxi Jia, and Guo-Jun Qi. Knowledge-enriched distributional model inversion attacks. In *Proceedings of the IEEE/CVF International Conference on Computer Vision (ICCV)*, pages 16178–16187, October 2021. 1
- [2] Yu Cheng, Jian Zhao, Zhecan Wang, Yan Xu, Karlekar Jayashree, Shengmei Shen, and Jiashi Feng. Know you at one glance: A compact vector representation for low-shot learning. In *Proceedings of the IEEE International Conference on Computer Vision (ICCV) Workshops*, Oct 2017. 2
- [3] Gregory Cohen, Saeed Afshar, Jonathan Tapson, and André van Schaik. Emnist: Extending mnist to handwritten letters. In *2017 International Joint Conference on Neural Networks (IJCNN)*, pages 2921–2926, 2017. 1
- [4] Tuomas Haarnoja, Aurick Zhou, Pieter Abbeel, and Sergey Levine. Soft actor-critic: Off-policy maximum entropy deep reinforcement learning with a stochastic actor. In Jennifer Dy and Andreas Krause, editors, *Proceedings of the 35th International Conference on Machine Learning*, volume 80 of *Proceedings of Machine Learning Research*, pages 1861–1870. PMLR, 10–15 Jul 2018. 1
- [5] Mostafa Kahla, Si Chen, Hoang Anh Just, and Ruoxi Jia. Label-only model inversion attacks via boundary repulsion. In *Proceedings of the IEEE/CVF Conference on Computer Vision and Pattern Recognition (CVPR)*, pages 15045–15053, June 2022. 1
- [6] Yann LeCun, Corinna Cortes, and Christopher J.C. Burges. The mnist database of handwritten digits. 1998. 1
- [7] Ziwei Liu, Ping Luo, Xiaogang Wang, and Xiaoou Tang. Deep learning face attributes in the wild. In *Proceedings of the IEEE International Conference on Computer Vision (ICCV)*, December 2015. 2
- [8] Ziqi Yang, Jiyi Zhang, Ee-Chien Chang, and Zhenkai Liang. Neural network inversion in adversarial setting via background knowledge alignment. In *Proceedings of the 2019 ACM SIGSAC Conference on Computer and Communications Security, CCS ’19*, pages 225–240, New York, NY, USA, 2019. ACM. 1
- [9] Yuheng Zhang, Ruoxi Jia, Hengzhi Pei, Wenxiao Wang, Bo Li, and Dawn Song. The secret revealer: Generative model-inversion attacks against deep neural networks. In *Proceed-*
